# Supplementary material
Source: publisher figshare collection journal article supplement (https://acs.figshare.com/ndownloader/files/3978583)
Supplement: Supplementary file 1 [file 3978583]

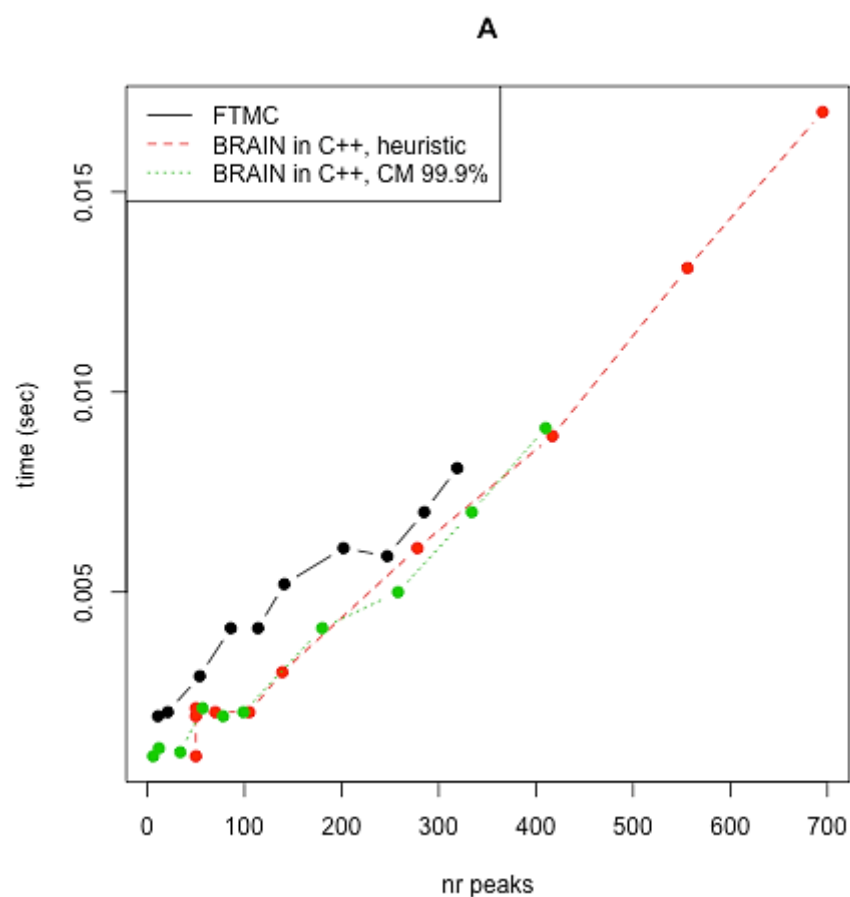

**Figure S1:** Average system time elapsed in function of the number of computed peaks for FTMC and BRAIN in C++ with input file containing 100 times the same molecules for each averagine molecule (shown system times are divided by 100). The data points corresponding to the same number of peaks do not correspond to the same molecule.
